# Supplementary material
Source: PubMed Central journal article supplement (PMC7114532)
Supplement: mmc1.pdf [file mmc1.pdf]

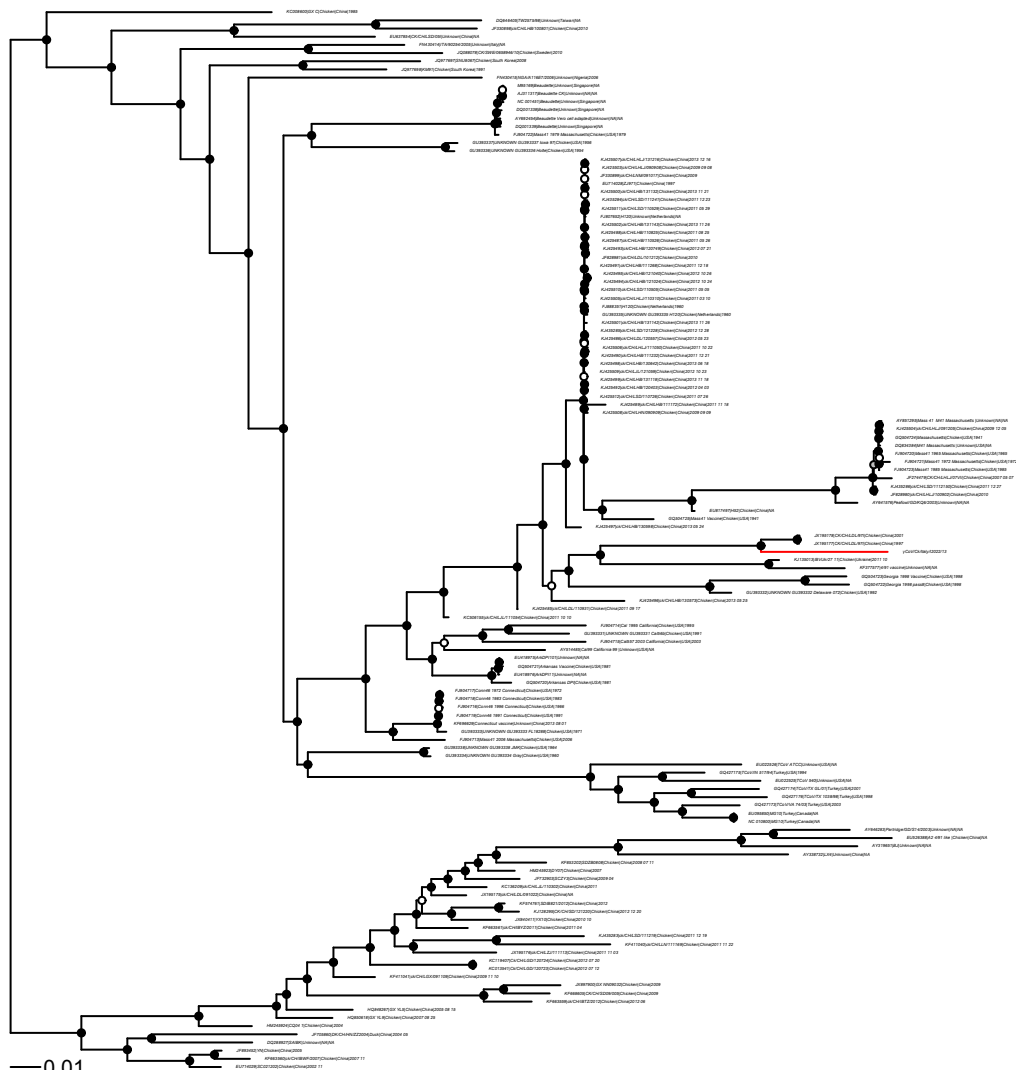

Supplementary figure 1. Maximum likelihood phylogenetic tree based on 130 complete genome sequences. Branch corresponding to strain yCoV/CK/Italy/2022/13 is colored in red. Nodes displaying a bootstrap support higher than 70%, between 70 and 50% and lower than 50% are represented as black, grey and white circles, respectively. It is possible to zoom in to appreciate further details and tip labels
